# Supplementary material for: Effects of a TELephone Counselling Intervention by Pharmacist (TelCIP) on medication adherence, patient beliefs and satisfaction with information for patients starting treatment: study protocol for a cluster randomized controlled trial
Source: PubMed Central journal article supplement (PMC4050986; doi:10.1186/1472-6963-14-219), 2014-05-15
Supplement: 1472-6963-14-219-S1.pdf [file 1472-6963-14-219-S1.pdf]

| <b>RAS-inhibitors</b> |                                                          |
|-----------------------|----------------------------------------------------------|
| ATC-code              | Name                                                     |
| C09AA01               | captopril                                                |
| C09AA02               | enalapril                                                |
| C09AA03               | lisinopril                                               |
| C09AA04               | perindopril                                              |
| C09AA05               | ramipril                                                 |
| C09AA06               | quinapril                                                |
| C09AA07               | benazepril                                               |
| C09AA08               | cilazapril                                               |
| C09AA09               | fosinopril                                               |
| C09AA10               | trandolapril                                             |
| C09AA15               | zofenopril                                               |
| C09BA01               | captopril and diuretics                                  |
| C09BA02               | enalapril and diuretics                                  |
| C09BA03               | lisinopril and diuretics                                 |
| C09BA04               | perindopril and diuretics                                |
| C09BA05               | ramipril and diuretics                                   |
| C09BA06               | quinapril and diuretics                                  |
| C09BA09               | fosinopril and diuretics                                 |
| C09BB02               | enalapril and lercanidipine                              |
| C09BB04               | perindopril and amlodipine                               |
| C09BB10               | trandolapril and verapamil                               |
| C09CA01               | losartan                                                 |
| C09CA02               | eprosartan                                               |
| C09CA03               | valsartan                                                |
| C09CA04               | irbesartan                                               |
| C09CA06               | candesartan                                              |
| C09CA07               | telmisartan                                              |
| C09CA08               | olmesartan                                               |
| C09DA01               | losartan and diuretics                                   |
| C09DA02               | eprosartan and diuretics                                 |
| C09DA03               | valsartan and diuretics                                  |
| C09DA04               | irbesartan and diuretics                                 |
| C09DA06               | candesartan and diuretics                                |
| C09DA07               | telmisartan and diuretics                                |
| C09DA08               | olmesartan medoxomil and diuretics                       |
| C09DB01               | valsartan and amlodipine                                 |
| C09DB02               | olmesartan medoxomil and amlodipine                      |
| C09DX01               | valsartan, amlodipine and hydrochlorothiazide            |
| C09DX03               | olmesartan medoxomil, amlodipine and hydrochlorothiazide |
| C09XA02               | aliskiren                                                |
| C09XA52               | aliskiren and hydrochlorothiazide                        |

| <b>Lipid lowering drugs</b> |                                                    |
|-----------------------------|----------------------------------------------------|
| ATC-code                    | Name                                               |
| C10AA01                     | simvastatin                                        |
| C10AA03                     | pravastatin                                        |
| C10AA04                     | fluvastatin                                        |
| C10AA05                     | atorvastatin                                       |
| C10AA06                     | cerivastatin                                       |
| C10AA07                     | rosuvastatin                                       |
| C10AB02                     | bezafibrate                                        |
| C10AB04                     | gemfibrozil                                        |
| C10AB08                     | ciprofibrate                                       |
| C10AC01                     | colestyramine                                      |
| C10AC02                     | colestipol                                         |
| C10AC04                     | colesevelam                                        |
| C10AD02                     | nicotinic acid                                     |
| C10AD06                     | acipimox                                           |
| C10AX06                     | omega-3-triglycerides incl. other esters and acids |
| C10AX09                     | ezetimibe                                          |
| C10BA02                     | simvastatin and ezetimibe                          |

| <b>Bisphosphonates</b> |                                                         |
|------------------------|---------------------------------------------------------|
| ATC-code               | Name                                                    |
| M05BA01                | etidronic acid                                          |
| M05BA02                | clodronic acid                                          |
| M05BA03                | pamidronic acid                                         |
| M05BA04                | alendronic acid                                         |
| M05BA06                | ibandronic acid                                         |
| M05BA07                | risedronic acid                                         |
| M05BB01                | etidronic acid and calcium, sequential                  |
| M05BB02                | risedronic acid and calcium, sequential                 |
| M05BB03                | alendronic acid and colecalciferol                      |
| M05BB05                | alendronic acid, calcium and colecalciferol, sequential |
| M05BX03                | strontium ranelate                                      |

| <b>Antidepressants</b> |              |
|------------------------|--------------|
| ATC-code               | Name         |
| N06AB03                | fluoxetine   |
| N06AB04                | citalopram   |
| N06AB05                | paroxetine   |
| N06AB06                | sertraline   |
| N06AB08                | fluvoxamine  |
| N06AB10                | escitalopram |
| N06AX05                | trazodone    |
| N06AX11                | mirtazapine  |
| N06AX16                | venlafaxine  |
